# Supplementary material for: FluoroPi Device With SmartProbes: A Frugal Point-of-Care System for Fluorescent Detection of Bacteria From a Pre-Clinical Model of Microbial Keratitis
Source: PubMed Central journal article supplement (PMC10324419; doi:10.1167/tvst.12.7.1), 2023-07-03
Supplement: tvst-12-7-1_s001.pdf [file tvst-12-7-1_s001.pdf]

1 **Supplementary Information**

2 **FluoroPi device with SmartProbes: a frugal point-of-care system for fluorescent**  
3 **detection of bacteria from a pre-clinical model of microbial keratitis**

4

5 **Syam Mohan P.C. Mohanan<sup>1\*</sup>, Kay Russell<sup>1\*</sup>, Sheelagh Duncan<sup>1</sup>, Alex Kiang<sup>1</sup>, Charles**  
6 **Lochenie<sup>1</sup>, Emma Duffy<sup>1</sup>, Stephnie Kennedy<sup>2</sup>, N. Venkatesh Prajna<sup>3</sup>, Rachel L. Williams<sup>2</sup>,**  
7 **Kevin Dhaliwal<sup>1</sup>, Gareth O.S. Williams<sup>1#</sup> and Bethany Mills<sup>1#</sup>**

8 <sup>1</sup> Translational Healthcare Technologies Group, Centre for Inflammation Research, University of  
9 Edinburgh, Edinburgh, UK

10 <sup>2</sup>Department of Eye and Vision Science, University of Liverpool, Liverpool, UK

11 <sup>3</sup>Department of Cornea and Refractive Surgery, Aravind Eye Hospital, Madurai, India

12

13 <sup>\*#</sup>Authors contributed equally

14 E-mail: G.O.S.Williams@ed.ac.uk, Beth.Mills@ed.ac.uk

15

16

17

18

## 19 **Supplementary Materials and Methods**

20

### 21 **FluoroPi Instrumentation**

22 The FluoroPi device consists two main modules; a detection module containing a camera and associated  
23 lenses for image capture and an illumination module consisting of multiple LEDs and lenses for sample  
24 illumination and excitation. There is a microscopy slide holder for sample placement and adjustment,  
25 and a Raspberry Pi single board computer (Version 3B+) [22] with associated touch screen for user  
26 input. The Raspberry Pi camera was connected to the single board computer through its dedicated CSI2  
27 ribbon cable port and was used for both the fluorescence and white-light image acquisition.

28 The illumination module comprised of blue (470 nm, M470L3 Thorlabs) and orange (590 nm, M590L4  
29 Thorlabs) excitation LEDs for fluorescence imaging. White-light transmission imaging of the sample  
30 was performed using a white-light emitting through hole LED (C503D-WAN-CCbEb151, Cree). 30  
31 mm focal length lenses (LA1289-A-MLThorlabs) were connected to the distal end of the lens tubes  
32 attached to the LEDs. These lenses were used to produce a 1 mm spot, filling the system's field of view  
33 (FoV). The blue and orange LEDs had optical powers of 4 and 2.28 mW respectively, measured at the  
34 sample plane after focusing, using a Thorlabs power meter (PM100D with S130C Sensor). The optical  
35 output power of white LED was measured to be 23  $\mu$ W by setting the power meter to 520 nm assuming  
36 low deviation due to the spectral response of the sensor.

37 The image detection module consisted of a 12-megapixel CMOS camera (RPI-HQ-CAMERA) coupled  
38 with a low-cost primary lens (Raspberry Pi camera V2 Lens) using a half inch lens tube (SM05L30  
39 Thorlabs). The primary lens of 3.6 mm focal length was placed at the distal end of the lens tube to  
40 collect the fluorescence signal from the sample. An emission filter appropriate for removing any  
41 remaining excitation light (ET470/625/780M for the blue LED, ET610LP for the orange LED,  
42 (Chroma)) was placed in between the camera sensor and the lens. Note that the multiband filter used  
43 for the removal of the blue LED has a second transmission band that allows for partial transmission of

44 the emission from the Merocy-Van SmartProbe (Figure 1C), the full filter transmission profile is given  
45 in Supplementary Figure S1. Future version of the device will optimise filters for out of band rejection.

46 A photograph of the proof-of-concept prototype device is shown in Figure 1B. An X-Y stage with a  
47 microscopy slide holder (XFY1, Thorlabs) was incorporated to support the sample during the  
48 experiment. The choice of lenses produced an optical magnification of ~25x providing sufficient  
49 resolution for the target applications-

50

### 51 **Determination of FluoroPi field of view and imaging resolution.**

52 The imaging FoV was determined using a haemocytometer (Fuchs Rosenthal C-Chip Disposable  
53 Haemocytometer, LabTech) mounted within the slide holder and white-light LED imaging of the etched  
54 grid pattern with FluoroPi (Supplementary Figure S2A). The distance between grid-lines was  
55 determined by imaging the same slide on a calibrated wide-field microscope (Leica DMI8 Basic) and  
56 measuring the distance between grid lines using LAS X software (Leica) (Supplementary Figure S2A).  
57 The calculated distances were incorporated with Image J (Fiji) to determine the FoV and set scale bars  
58 for subsequent data collected with FluoroPi. The imaging resolution of FluoroPi was determined using  
59 a United States Air Force (USAF) 1951 test target illuminated with white-light. The smallest available  
60 lines (group 7, elements 1-6) of the test target were very clearly captured (Supplementary Figure S2B)  
61 by FluoroPi, and were easily resolvable. To calculate the absolute resolution of the imaging platform, a  
62 cross sectional line profile was taken across the smallest elements (2.19  $\mu\text{m}$  in width) in the target  
63 (group 7 element 6, Supplementary Figure S2B4). Assuming the feature edges on the target are  
64 infinitely steep the resolution of the system can be determined by a Gaussian fit to the profile of the  
65 feature edge. This fit yielded an absolute resolution of the imaging platform of ~630 nm.

66

### 67 **FluoroPi Image Processing**

68 Image processing was conducted with Image J (Fiji) software. The use of simple lenses and filters led  
69 to uneven sample illumination causing significant spatial artefacts along with the presence of scattering  
70 of light. To correct for these artefacts and improve image quality, a background slide image was

71 subtracted from corresponding sample during post-processing. Resultant images were subsequently  
72 brightness and contrast enhanced. The same enhancement was applied to all images within a sample  
73 type to ensure consistency and the ability to cross compare.

74

#### 75 ***Ex vivo* porcine cornea preparation**

76 Fresh porcine eyes were received from “pre-tank” pigs within 12 h of their slaughter from a local  
77 abattoir (Browns Food Group (Quality Pork Processors Ltd.)). The eyes were kept on ice during  
78 transportation and at 4 °C thereafter. Any remaining extra-ocular tissue was removed, and the eyes  
79 were stored at in phosphate buffered saline (PBS) (Invitrogen) overnight. The eyes were immersed in  
80 PBS containing 1% [v/v] penicillin/streptomycin and amphotericin B (P/S/AmpB) (Merck, UK) for 2  
81 min, followed by 2 min in 3 % [v/v] povidone iodine (Videne, UK) diluted in PBS. The eyes were  
82 washed a further three times in antibiotic-free PBS.

83 Next, the epithelium was removed from the cornea mechanically through scraping with a scalpel blade.  
84 The cornea-scleral rims were dissected from the globe, and the lens, ciliary body, iris and trabecular  
85 meshwork removed. The cornea-scleral rims were submerged again for 2 min each in PBS:P/S/AmpB,  
86 followed by the iodine solution and then washed thrice in PBS.

87 The internal side of the cornea-scleral rims were filled with 1 % [w/v] ultra-pure-agarose dissolved into  
88 Dulbecco’s Modified Eagles Medium (DMEM, ThermoFisher) containing Foetal Bovine Serum 10%  
89 [v/v] (Labteck, UK). The agarose supports were set at room temperature, and the cornea-scleral rims  
90 were placed into individual wells of a 6-well plate (Corning) epithelial side up.

91

92 **Supplementary Figures**

93

94

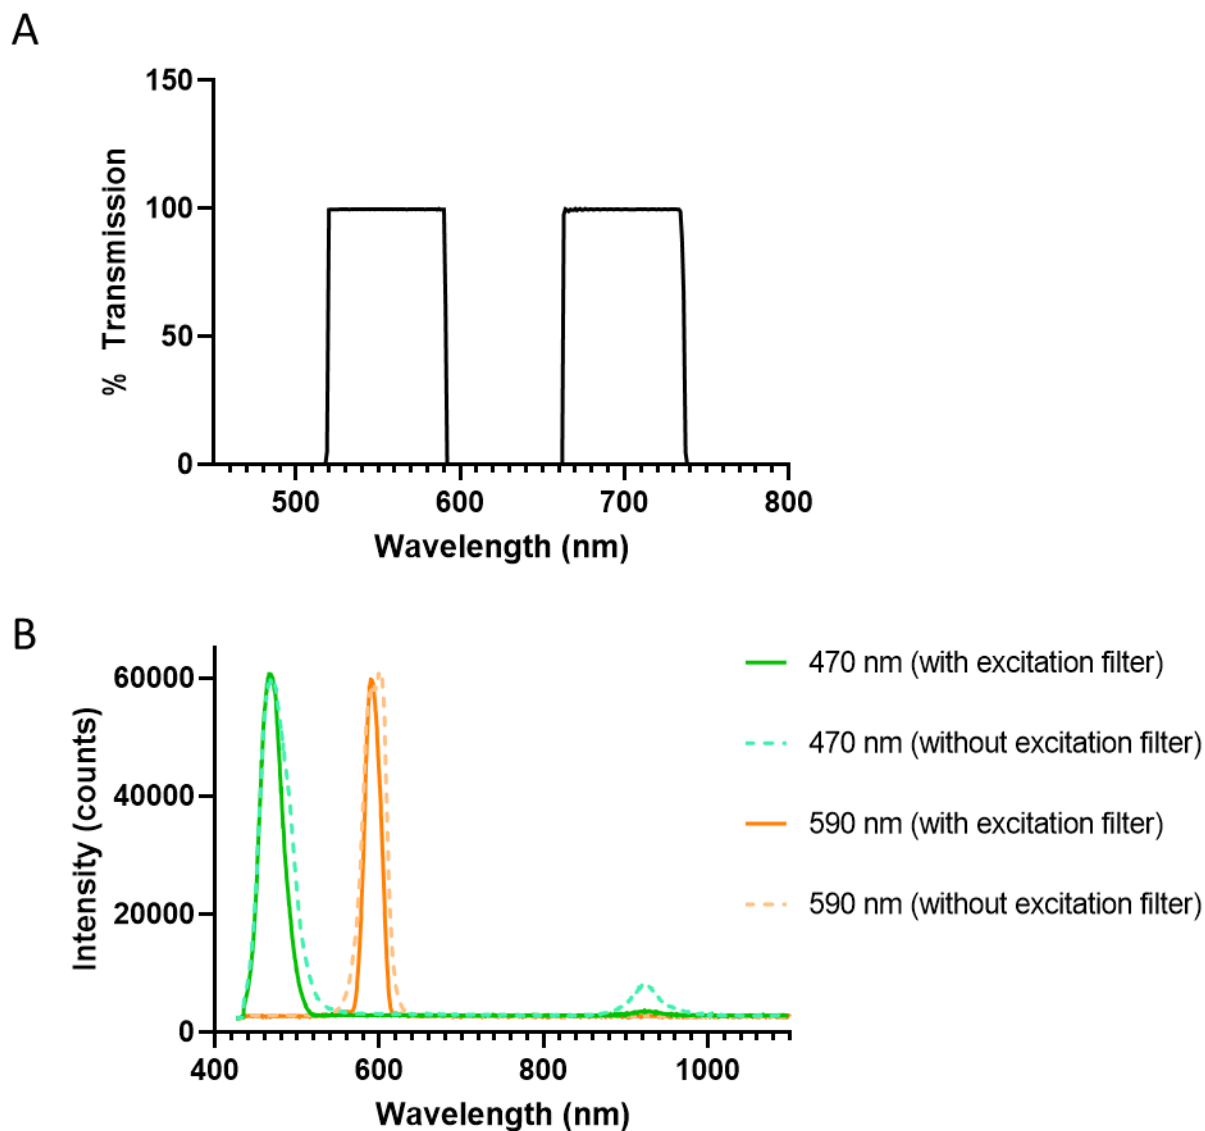

**ESI Figure S1.** (A) Transmission profile of the filter used in conjunction with the blue excitation LED, note that the second transmission window partially overlaps with the emission spectrum of the Merocy-Vanc SmartProbe (Figure 1C). (B) Excitation spectra of 470 nm and 590 nm LEDs with and without excitation filter.

95

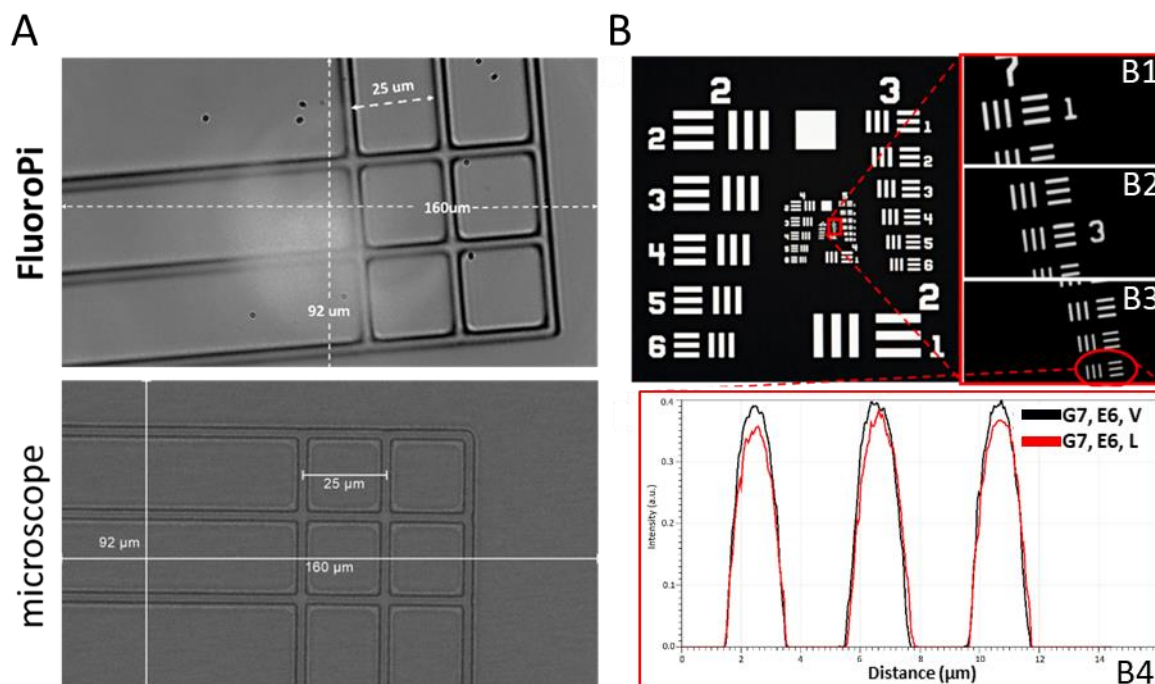

**ESI Figure S2.** Characterisation of FluoroPi FoV and imaging resolution. (A) Imaging of haemocytometer slide with FluoroPi (top) and commercial microscope (bottom). (B) USAF 1951 test target used to determine imaging resolution of FluoroPi. (B1-3) Images of USAF target group 7 captured with FluoroPi. (B4) Cross sectional profiles of lateral and vertical lines of the smallest elements of USAF target group 7.

97

98

99

100

101

102

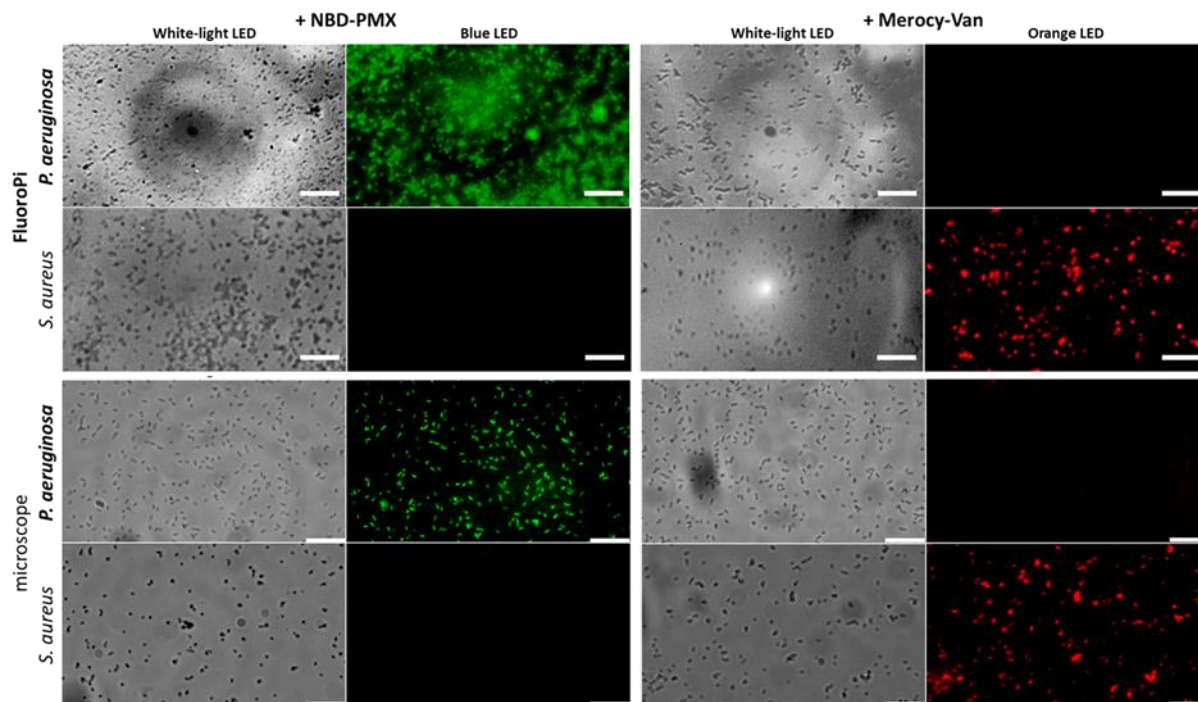

**ESI Figure S3.** Bright-field and single-channel fluorescence FluoroPi imaging of *P. aeruginosa* and *S. aureus* in the presence of NBD-PMX (green) or Merocy-Van (red). Imaging was conducted without removal of excess SmartProbe. The Blue LED was used to excite NBD-PMX, and the Orange LED was used to excite Merocy-Van. Top: FluoroPi imaging. Bottom: commercial microscope imaging with FITC (green) and Texas Red (red) imaging parameters. Scale bar = 20  $\mu\text{m}$ . Representative FoVs shown,  $n = 3$  independent repeats.

103

104

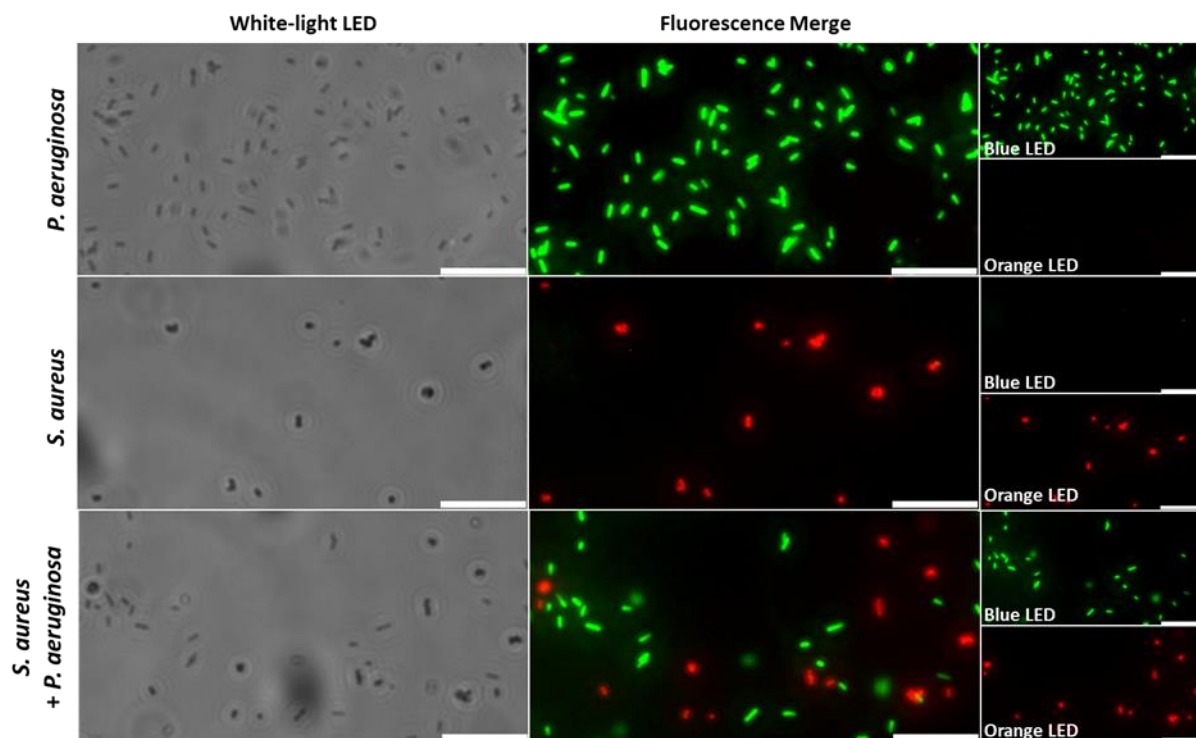

**ESI Figure S4.** Bright-field and dual-channel fluorescence commercial microscope imaging of *P. aeruginosa* and *S. aureus* in the presence of NBD-PMX (green) and Merocy-Van (red). Imaging was conducted without removal of excess SmartProbe. Imaging with FITC (green) and Texas Red (red) imaging parameters. Merged fluorescence image and individual bands shown. Scale bar = 20  $\mu$ m. Representative FoVs shown, n = 3 independent repeats.

105

106



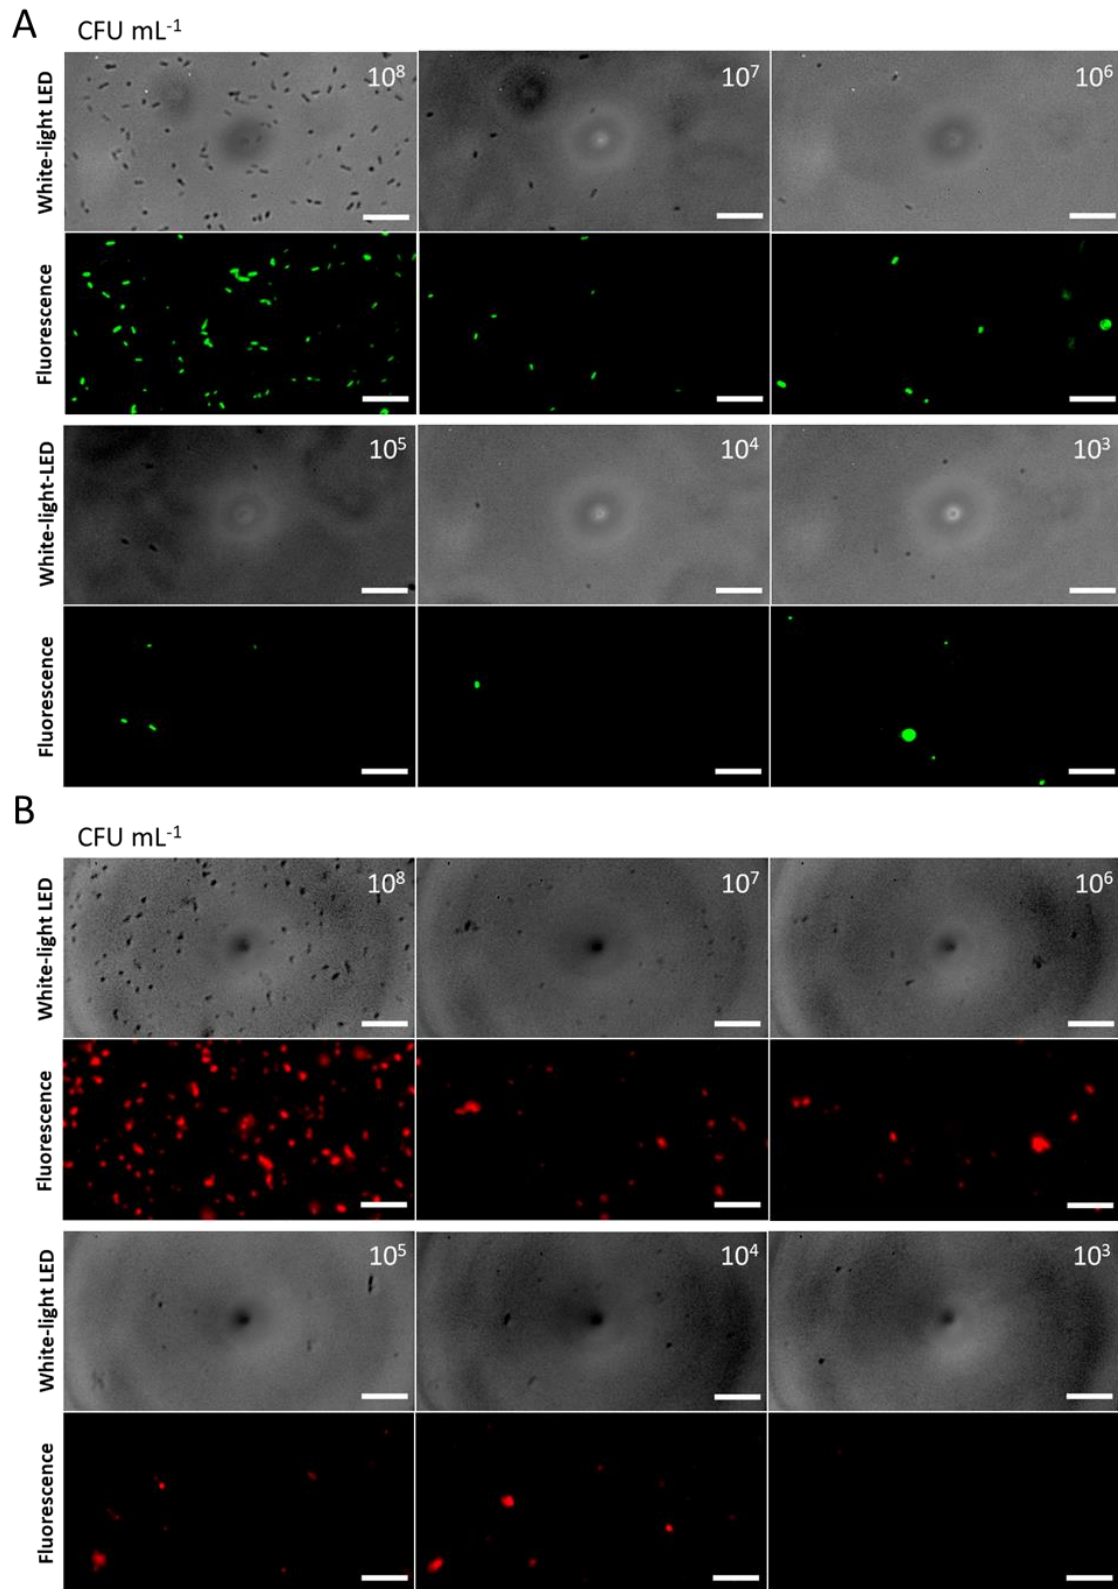

**ESI Figure S5.** FluoroPi bright-field and single-channel fluorescence FluoroPi imaging of serial dilutions of (A) *P. aeruginosa* with NBD-PMX (green) and (B) *S. aureus* with Merocy-Van (red) to determine bacterial limit of detection. Imaging was conducted without removal of excess SmartProbe. The Blue LED was used to excite NBD-PMX, and the Orange LED was used to excite Merocy-Van. Scale bar = 20  $\mu$ m. Representative FoVs shown, n = 3 independent repeats.

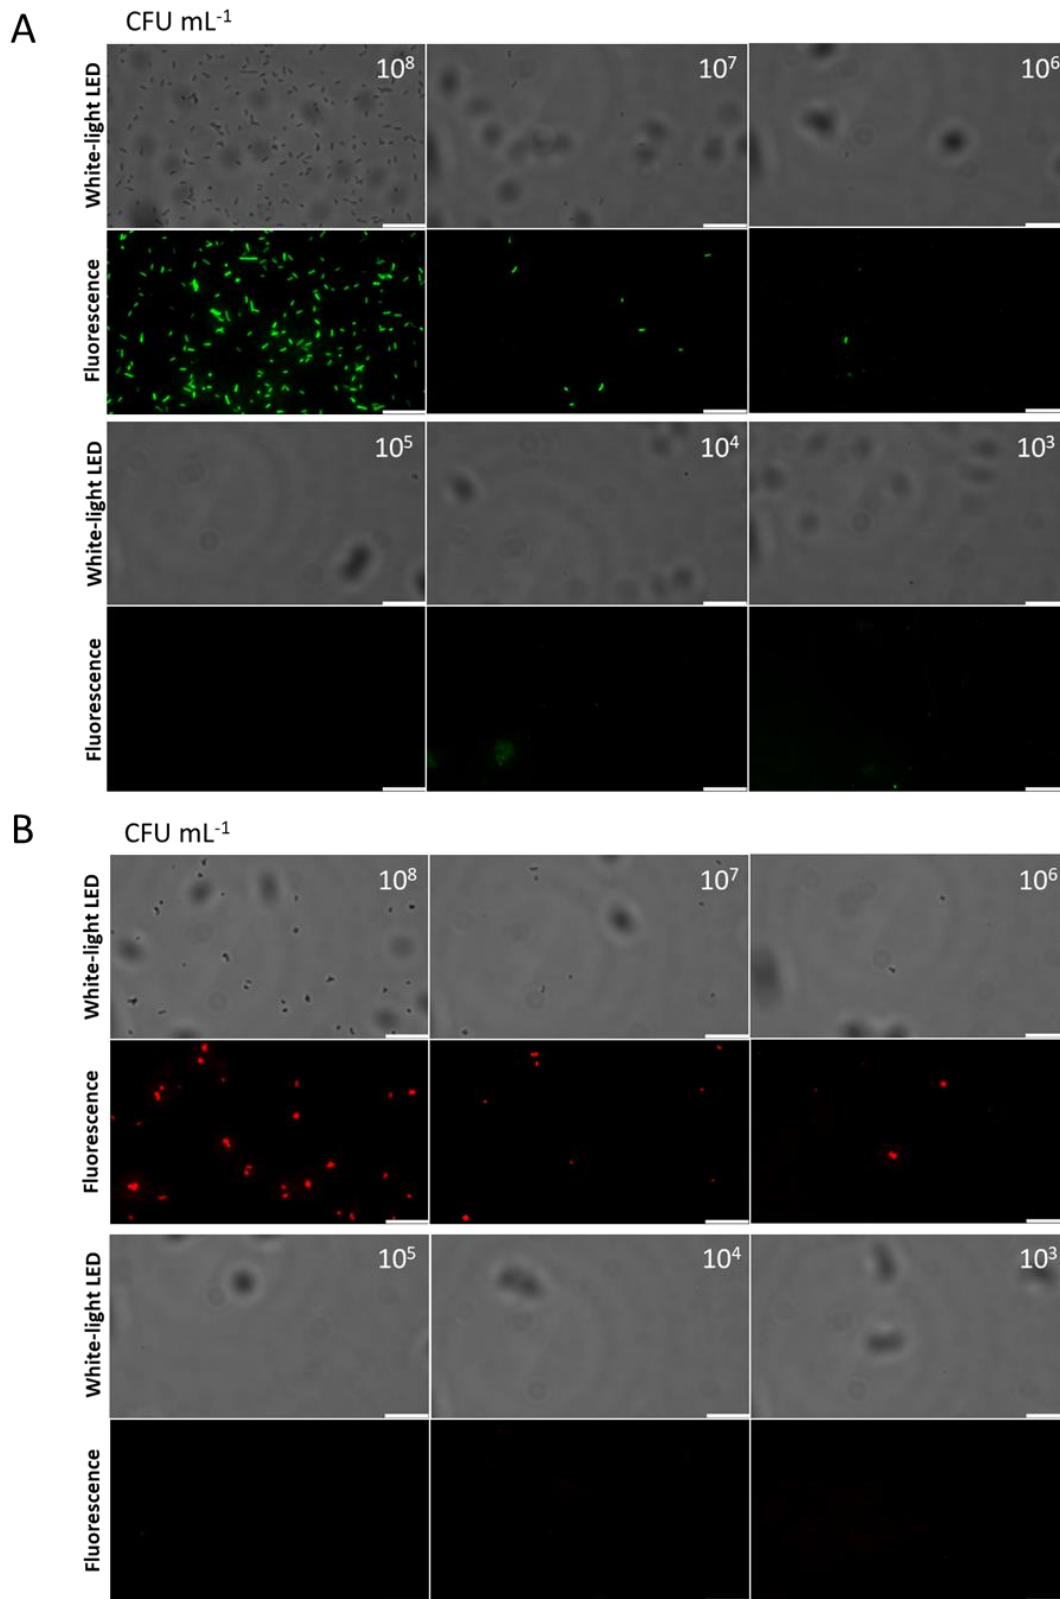

108

**ESI Figure S6.** Commercial microscope bright-field and single-channel fluorescence microscope imaging of serial dilutions of **(A)** *P. aeruginosa* with NBD-PMX (green) and **(B)** *S. aureus* with Merocy-Van (red) to determine bacterial limit of detection. Imaging was conducted without removal of excess SmartProbe. Imaging with **(A)** FITC (green) and **(B)** Texas Red (red) imaging parameters. Scale bar = 20  $\mu$ m. Representative FoVs shown, n = 3 independent repeats.

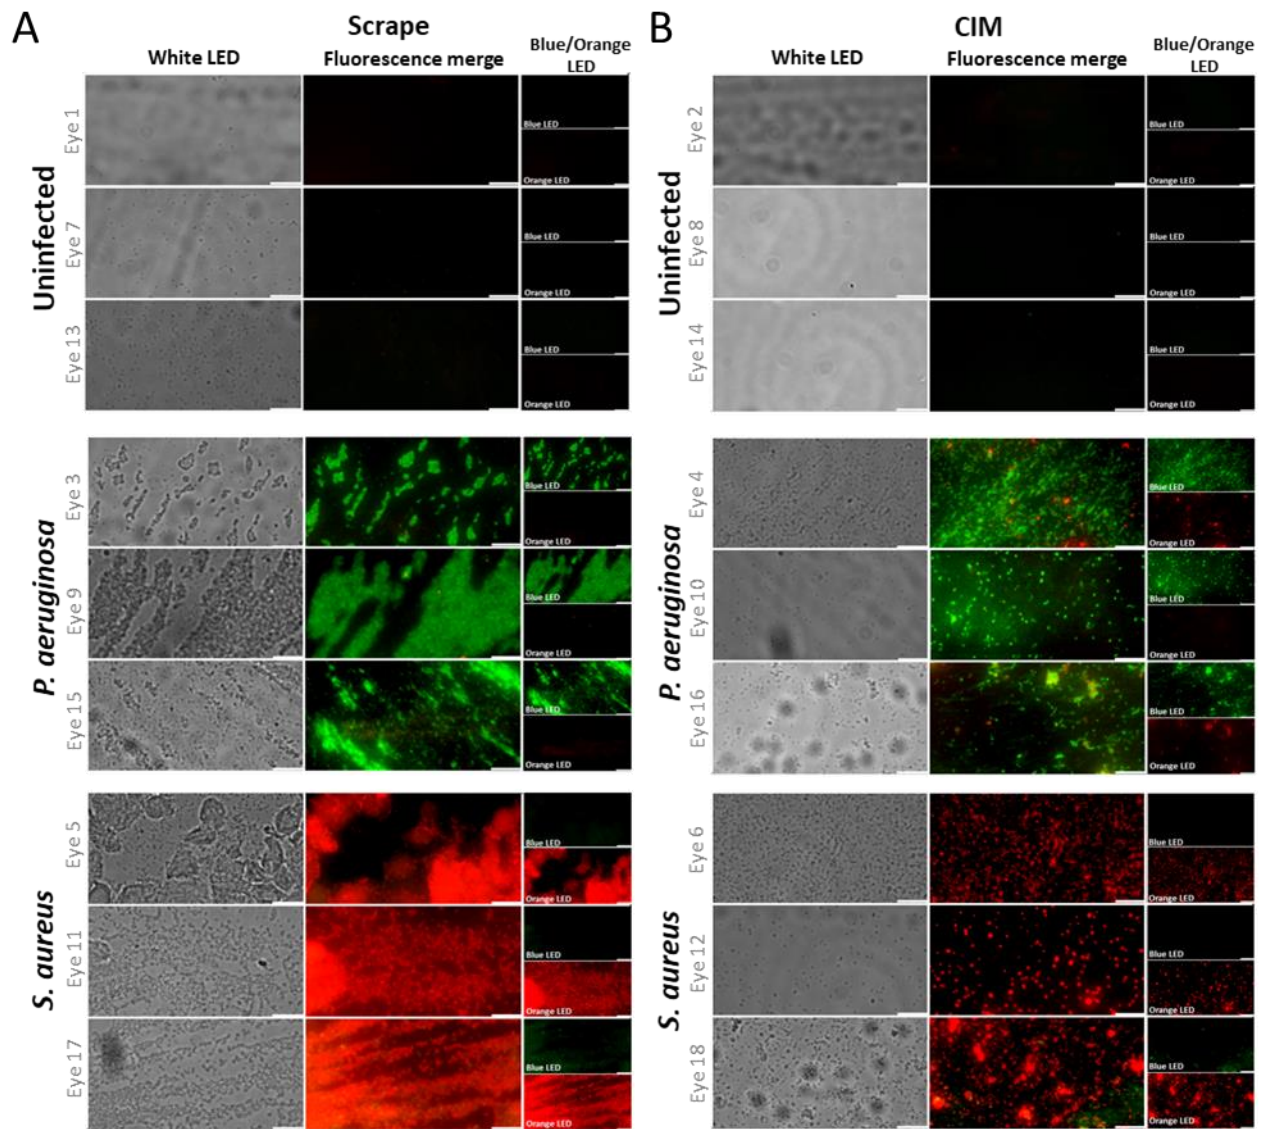

**ESI Figure S7.** Bright-field and multiplexed fluorescence imaging of (A) scrapes and (B) CIMs collected from infected *ex vivo* porcine cornea in the presence of NBD-PMX (green) and Merocy-Van (red). Imaging was conducted with commercial microscope without removal of excess SmartProbe. Merged fluorescence image and individual bands shown. Imaging with FITC (green) and (B) Texas Red (red) imaging parameters. Scale bar = 20  $\mu$ m. Representative FoVs shown.
